# Supplementary material for: Materials Contamination and Indoor Air Pollution Caused by Tar Products and Fungicidal Impregnations: Intervention Research in 2014–2019
Source: MDPI journal article supplement (doi:10.3390/s20154099), 2020-07-23
Supplement: s1 [file s1]

Supplementary Material

# Materials Contamination and Indoor Air Pollution Caused by Tar Products and Fungicidal Impregnations: Intervention Research in 2014–2019

Mateusz Kozicki \* and Adam Niesłochowski

Department of Thermal Physics, Acoustics and Environment, Building Research Institute, 00-611 Warsaw, Poland; a.nieslochowski@itb.pl

\* Correspondence: m.kozicki@itb.pl; Tel.: +48-22-57-96-187

Received: 17 June 2020; Accepted: 20 July 2020; Published: date

**Table S1.** Table VOC emission from samples of construction products taken from different buildings. In total, 73 samples were taken from 32 premises.

| Identified Chemical<br>Compound<br>[CAS Number]                     | The Mass of the Separated Chemical Compound<br>Calculated in Milligrams Per Kilogram of Sample Mass [mg/kg] |         |       |                                                 |           |          |                                              |          |        |                                         |        |        |
|---------------------------------------------------------------------|-------------------------------------------------------------------------------------------------------------|---------|-------|-------------------------------------------------|-----------|----------|----------------------------------------------|----------|--------|-----------------------------------------|--------|--------|
|                                                                     | Tar Paper<br>(11 Cases; 25<br>Samples)                                                                      |         |       | Insulating Fiberboard<br>(10 Cases; 16 Samples) |           |          | Wooden Construction<br>(7 Cases; 26 Samples) |          |        | Tar Adhesive<br>(4 Cases; 6<br>Samples) |        |        |
|                                                                     | PAHs                                                                                                        |         |       |                                                 |           |          |                                              |          |        |                                         |        |        |
|                                                                     | N                                                                                                           | max.    | GM    | N                                               | max.      | GM       | N                                            | max.     | GM     | N                                       | max.   | GM     |
| Naphthalene<br>[91-20-3]                                            | 19                                                                                                          | 25 ± 4  | 2 ± 1 | 13                                              | 31 ± 5    | 2 ± 1    | 25                                           | 206 ± 31 | 6 ± 1  | 6                                       | 38 ± 6 | 4 ± 1  |
| Methylnaphthalenes<br>[91-57-6, 90-12-0]                            | 17                                                                                                          | 65 ± 10 | 9 ± 1 | 11                                              | 244 ± 37  | 14 ± 2   | 21                                           | 258 ± 39 | 11 ± 2 | 4                                       | 21 ± 3 | 14 ± 2 |
| Dimethylnaphthalenes<br>[575-43-9, 582-16-1,<br>571-61-9, 569-41-5] | 13                                                                                                          | 84 ± 13 | 5 ± 1 | 8                                               | 732 ± 110 | 13 ± 2   | 21                                           | 377 ± 57 | 9 ± 1  | 3                                       | 21 ± 3 | 15 ± 2 |
| Trimethylnaphthalenes<br>[829-26-5, 2131-41-1]                      | 7                                                                                                           | 25 ± 4  | 1 ± 1 | 2                                               | 3 ± 1     | 2 ± 1    | 13                                           | 95 ± 14  | 5 ± 1  |                                         | nd     |        |
| Biphenyl<br>[92-52-4]                                               | 10                                                                                                          | 16 ± 2  | 2 ± 1 | 6                                               | 4 ± 1     | 1 ± 1    | 21                                           | 87 ± 13  | 3 ± 1  | 3                                       | 6 ± 1  | 5 ± 1  |
| 2-Methylobiphenyl<br>[643-58-3]                                     | 2                                                                                                           | 24 ± 4  | 4 ± 1 | 2                                               | 76 ± 11   | 47 ± 11  | 8                                            | 56 ± 8   | 2 ± 1  |                                         | nd     |        |
| Acenaphthylene<br>[208-96-8]                                        | 1                                                                                                           | 3 ± 1   | 3 ± 1 | 2                                               | 190 ± 28  | 126 ± 19 | 1                                            | 21 ± 3   | 21 ± 3 |                                         | nd     |        |
| Acenaphthene<br>[83-32-9]                                           | 13                                                                                                          | 37 ± 6  | 2 ± 1 | 10                                              | 484 ± 73  | 4 ± 1    | 22                                           | 270 ± 40 | 3 ± 1  | 3                                       | 6 ± 1  | 5 ± 1  |
| Fluorene<br>[86-73-7]                                               | 11                                                                                                          | 16 ± 2  | 1 ± 1 | 5                                               | 170 ± 26  | 5 ± 1    | 20                                           | 240 ± 36 |        | 4                                       | 4 ± 1  | 1 ± 1  |
| 2-Hydroxyfluorene<br>[2443-58-5]                                    |                                                                                                             | nd      |       |                                                 | nd        |          | 14                                           | 104 ± 16 | 15 ± 2 |                                         | nd     |        |
| 9H-Fluoren-9-on<br>[486-25-9]                                       | 1                                                                                                           | 3 ± 1   | 3 ± 1 | 2                                               | 39 ± 6    | 28 ± 4   | 1                                            | 1 ± 1    | 1 ± 1  |                                         | nd     |        |
| Phenanthrene<br>[85-01-8]                                           | 15                                                                                                          | 8 ± 1   | 2 ± 1 | 12                                              | 81 ± 12   | 4 ± 1    | 22                                           | 619 ± 93 | 4 ± 1  | 4                                       | 5 ± 1  | 2 ± 1  |
| Anthracene<br>[120-12-7]                                            | 6                                                                                                           | 4 ± 1   | 1 ± 1 | 2                                               | 8 ± 1     | 7 ± 1    | 16                                           | 541 ± 81 | 22 ± 3 | 3                                       | 2 ± 1  | 1 ± 1  |
| Methylanthracenes<br>[610-48-0, 613-12-7]                           |                                                                                                             | nd      |       |                                                 | nd        |          | 2                                            | 7 ± 1    | 7 ± 1  |                                         | nd     |        |
| Fluoranthene<br>[206-44-0]                                          |                                                                                                             | nd      |       |                                                 | nd        |          | 15                                           | 57 ± 9   | 6 ± 1  |                                         | nd     |        |
| Pyrene<br>[129-00-0]                                                | 3                                                                                                           | 1 ± 1   | 1 ± 1 | 2                                               | 1 ± 1     | 1 ± 1    | 15                                           | 35 ± 5   | 3 ± 1  |                                         | nd     |        |
| Heterocyclic compounds                                              |                                                                                                             |         |       |                                                 |           |          |                                              |          |        |                                         |        |        |

|                                                |    |           |        |    |          |        |    |          |        |               |
|------------------------------------------------|----|-----------|--------|----|----------|--------|----|----------|--------|---------------|
| Dibenzofuran<br>[132-64-9]                     | 13 | 23 ± 3    | 3 ± 1  | 7  | 263 ± 39 | 10 ± 2 | 19 | 258 ± 39 | 6 ± 1  | nd            |
| 9H-Xanthene<br>[92-83-1]                       | 6  | 6 ± 1     | 2 ± 1  | 2  | 1 ± 1    | 1 ± 1  | 16 | 98 ± 15  | 3 ± 1  | nd            |
| Benzothiophene<br>[270-82-6]                   | 2  | 1 ± 1     | 1 ± 1  |    | nd       |        | 16 | 13 ± 2   | 2 ± 1  | nd            |
| 2-Methylpyridine<br>[109-06-8]                 |    | nd        |        | 2  | 3 ± 1    | 3 ± 1  |    | nd       |        | nd            |
| Quinoline<br>[91-22-5]                         | 3  | 1 ± 1     | 1 ± 1  | 5  | 22 ± 3   | 2 ± 1  | 11 | 67 ± 10  | 5 ± 1  | nd            |
| Cl-VOCs                                        |    |           |        |    |          |        |    |          |        |               |
| Chloronaphthalene<br>[90-13-1]                 | 10 | 696 ± 104 | 4 ± 1  | 16 | 176 ± 26 | 4 ± 1  | 12 | 32 ± 5   | 4 ± 1  | 1 2 ± 1 2 ± 1 |
| Dichloronaphthalenes<br>[2050-75-1, 2198-77-8] | 3  | 12 ± 2    | 8 ± 1  | 6  | 24 ± 4   | 8 ± 1  | 12 | 34 ± 5   | 3 ± 1  | nd            |
| Trichloronaphthalene<br>[55720-37-1]           | 3  | 8 ± 1     | 6 ± 1  | 3  | 15 ± 2   | 11 ± 2 | 2  | 65 ± 10  | 56 ± 8 | nd            |
| 2,4-Dichlorophenol<br>[120-83-2]               | 1  | 1 ± 1     | 1 ± 1  | 1  | 1 ± 1    | 1 ± 1  | 3  | 32 ± 5   | 4 ± 1  | nd            |
| Phenolic compounds                             |    |           |        |    |          |        |    |          |        |               |
| Phenol<br>[108-95-2]                           | 2  | 12 ± 2    | 2 ± 1  |    | nd       |        | 11 | 31 ± 5   | 11 ± 2 | nd            |
| Cresols<br>[95-48-7, 106-44-5]                 | 2  | 41 ± 6    | 10 ± 2 |    | nd       |        | 17 | 92 ± 14  | 5 ± 1  | 1 4 ± 1 4 ± 1 |
| Xylenols<br>[95-87-4, 576-26-1]                | 2  | 72 ± 11   | 15 ± 2 |    | nd       |        | 17 | 146 ± 22 | 12 ± 2 | nd            |
| Ethylmethylphenol<br>[3855-26-3]               | 2  | 15 ± 2    | 2 ± 1  | 1  | 1 ± 1    | 1 ± 1  | 14 | 11 ± 2   | 1 ± 1  | nd            |

The expanded uncertainty representing the 95% confidence interval is 15%. The expanded uncertainty was calculated using a factor of  $k = 2$ . The uncertainty of the results was estimated on the basis of available data, including data on the accuracy of the measurement system used and data on repeatability obtained experimentally. **N:** number of measurements in which a given compound was identified. **max.:** the highest identified value. **GM:** geometric mean value for all measurements. **nd:** not detected.
